# Supplementary material
Source: PubMed Central journal article supplement (PMC5290242)
Supplement: CEI-187-383-s001.pdf [file CEI-187-383-s001.pdf]

**Supplementary material for:**

**Defective expression of apoptosis-related molecules in multiple sclerosis patients is normalized early after autologous hematopoietic stem cell transplantation**

de Oliveira GV et al., 2016

**Table S1. Gene expression levels of apoptotic-genes of patients at pre-transplant period (BEAM or Cyclophosmide conditioning regimens) and controls.**

| Group   | N Obs | Variable | N    | Mean    | Standard Deviation | Minimum | Q1     | Median  | Q3      | Maximum  |
|---------|-------|----------|------|---------|--------------------|---------|--------|---------|---------|----------|
| BEAM    | 7     | A1       | 5    | 292.03  | 343.65             | 0.14    | 14.95  | 173.59  | 462.31  | 809.14   |
|         |       | Bcl_2    | 5    | 1.47    | 2.32               | 0.0002  | 0.12   | 0.81    | 0.86    | 5.56     |
|         |       | Bcl_w    | 5    | 0.72    | 0.44               | 0.38    | 0.47   | 0.54    | 0.74    | 1.47     |
|         |       | Bcl_xL   | 5    | 45.59   | 15.10              | 24.91   | 37.20  | 47.52   | 54.56   | 63.77    |
|         |       | Mcl_1    | 5    | 5495.59 | 4753.47            | 366.65  | 520.19 | 7012.92 | 9514.69 | 10063.51 |
|         |       | c_Flip   | 5    | 64.45   | 109.54             | 0.003   | 12.06  | 21.01   | 29.80   | 259.40   |
|         |       | clAP_1   | 5    | 30.90   | 31.61              | 7.39    | 7.56   | 14.73   | 44.35   | 80.49    |
|         |       | clAP_2   | 5    | 227.91  | 255.17             | 0.17    | 29.22  | 232.74  | 238.47  | 638.97   |
|         |       | Bad      | 5    | 0.04    | 0.06               | 0       | 0      | 0       | 0.05    | 0.14     |
|         |       | Bak      | 5    | 7.10    | 6.04               | 0       | 4.39   | 5.41    | 9.73    | 15.97    |
|         |       | Bax      | 5    | 0.001   | 0.001              | 0       | 0      | 0       | 0       | 0.003    |
|         |       | Bid      | 5    | 698.38  | 641.12             | 27.26   | 110.97 | 810.54  | 972.39  | 1570.76  |
|         |       | Bik      | 5    | 2.84    | 5.03               | 0.03    | 0.51   | 0.75    | 1.12    | 11.81    |
|         |       | BimEL    | 5    | 29.27   | 23.61              | 1.01    | 12.98  | 28.49   | 43.68   | 60.21    |
|         |       | Bok      | 5    | 209.89  | 428.63             | 9.18    | 15.36  | 22.96   | 25.43   | 976.56   |
|         |       | Noxa     | 5    | 19.34   | 36.14              | 0.14    | 0.72   | 5.87    | 6.18    | 83.80    |
|         |       | Fas_     | 5    | 48.35   | 33.45              | 0.14    | 33.81  | 53.66   | 65.66   | 88.49    |
| FasL    | 5     | 6.92     | 6.63 | 0.04    | 0.81               | 7.68    | 10.23  | 15.87   |         |          |
| CONTROL | 18    | A1       | 18   | 111.12  | 100.19             | 37.85   | 52.26  | 79.97   | 134.50  | 458.44   |
|         |       | Bcl_2    | 18   | 72.70   | 99.39              | 0.16    | 0.80   | 24.89   | 146.45  | 354.42   |
|         |       | Bcl_w    | 18   | 2.97    | 2.39               | 0.60    | 1.01   | 2.03    | 4.61    | 8.18     |
|         |       | Bcl_xL   | 18   | 287.66  | 177.35             | 25.54   | 161.87 | 232.31  | 438.53  | 653.43   |

|              |           |               |         |         |         |         |         |         |          |          |
|--------------|-----------|---------------|---------|---------|---------|---------|---------|---------|----------|----------|
|              |           | <b>Mcl_1</b>  | 18      | 8194.19 | 4344.49 | 2348.79 | 5002.59 | 7537.15 | 10722.55 | 18245.09 |
|              |           | <b>c_Flip</b> | 18      | 116.26  | 85.82   | 16.52   | 47.18   | 96.84   | 165.43   | 319.93   |
|              |           | <b>ciAP_1</b> | 18      | 75.26   | 73.37   | 4.23    | 22.93   | 54.13   | 94.15    | 292.45   |
|              |           | <b>ciAP_2</b> | 18      | 150.15  | 107.17  | 14.14   | 78.09   | 125.44  | 195.37   | 470.35   |
|              |           | <b>Bad</b>    | 18      | 2.89    | 3.51    | 0.05    | 0.15    | 1.42    | 4.71     | 11.22    |
|              |           | <b>Bak</b>    | 18      | 166.75  | 149.85  | 0.01    | 8.38    | 139.96  | 276.07   | 429.02   |
|              |           | <b>Bax</b>    | 18      | 13.09   | 13.91   | 0.09    | 2.59    | 9.62    | 16.61    | 45.13    |
|              |           | <b>Bid</b>    | 18      | 26.68   | 39.99   | 2.01    | 6.29    | 13.49   | 30.12    | 178.04   |
|              |           | <b>Bik</b>    | 18      | 2.26    | 1.39    | 0.01    | 1.26    | 1.99    | 3.37     | 4.83     |
|              |           | <b>BimEL</b>  | 18      | 27.85   | 15.87   | 9.01    | 15.44   | 23.78   | 33.80    | 65.41    |
|              |           | <b>Bok</b>    | 18      | 2.02    | 2.17    | 0.002   | 0.38    | 1.49    | 2.46     | 7.79     |
|              |           | <b>Noxa</b>   | 18      | 82.41   | 139.06  | 0.28    | 7.38    | 17.56   | 77.25    | 512.53   |
|              |           | <b>Fas_</b>   | 18      | 78.85   | 43.20   | 16.84   | 43.99   | 76.42   | 99.10    | 192.53   |
|              |           | <b>FasL</b>   | 18      | 22.24   | 13.93   | 7.16    | 12.08   | 18.37   | 28.53    | 59.88    |
| <b>CY</b>    | <b>11</b> | <b>A1</b>     | 9       | 2375.25 | 4115.04 | 53.04   | 189.08  | 433.10  | 900.14   | 11702.09 |
|              |           | <b>Bcl_2</b>  | 9       | 56.08   | 81.92   | 0.39    | 4.07    | 6.33    | 59.11    | 228.85   |
|              |           | <b>Bcl_w</b>  | 9       | 1.99    | 2.35    | 0       | 0.0002  | 1.28    | 4.47     | 5.47     |
|              |           | <b>Bcl_xL</b> | 9       | 377.49  | 623.23  | 77.63   | 88.86   | 93.57   | 282.24   | 1984.59  |
|              |           | <b>Mcl_1</b>  | 9       | 6307.13 | 4941.27 | 23.91   | 1711.48 | 6462.41 | 10204.45 | 13240.66 |
|              |           | <b>c_Flip</b> | 9       | 118.13  | 118.23  | 0.75    | 13.37   | 118.99  | 161.74   | 338.18   |
|              |           | <b>ciAP_1</b> | 9       | 44.0466 | 66.01   | 0.25    | 2.06    | 6.09    | 46.92    | 180.78   |
|              |           | <b>ciAP_2</b> | 9       | 652.13  | 1200.84 | 0.05    | 177.78  | 319.03  | 374.61   | 3833.25  |
|              |           | <b>Bad</b>    | 9       | 1.35    | 1.76    | 0       | 0.001   | 0.07    | 2.94     | 4.37     |
|              |           | <b>Bak</b>    | 9       | 135.35  | 178.27  | 1.14    | 7.80    | 47.19   | 213.29   | 528.77   |
|              |           | <b>Bax</b>    | 9       | 9.18    | 13.14   | 0       | 0.002   | 0.01    | 19.17    | 35.49    |
|              |           | <b>Bid</b>    | 9       | 390.39  | 738.98  | 1.74    | 7.74    | 58.01   | 106.16   | 2122.36  |
|              |           | <b>Bik</b>    | 9       | 4.54    | 2.10    | 0.77    | 3.49    | 4.43    | 5.76     | 8.35     |
| <b>BimEL</b> | 9         | 416.32        | 1058.97 | 0.20    | 6.61    | 100.33  | 133.09  | 3235.79 |          |          |

|  |  |             |   |        |        |      |       |        |        |        |
|--|--|-------------|---|--------|--------|------|-------|--------|--------|--------|
|  |  | <b>Bok</b>  | 9 | 3.01   | 2.11   | 0.56 | 1.62  | 1.98   | 4.19   | 6.91   |
|  |  | <b>Noxa</b> | 9 | 23.15  | 33.46  | 1.53 | 3.72  | 9.63   | 12.34  | 89.41  |
|  |  | <b>Fas_</b> | 9 | 277.99 | 272.63 | 1.10 | 73.81 | 145.77 | 474.82 | 749.53 |
|  |  | <b>FasL</b> | 9 | 21.56  | 26.26  | 2.14 | 3.96  | 6.25   | 32.98  | 66.46  |

BEAM: BCNU. Etoposide. Aracytin and Melphalan; CY: Cyclophosphamide; IL: inferior limit; SL: superior limit; Obs: observations.

**Table S2. A1 gene expression levels of gene in patients at pre- and post- transplantation periods (BEAM or CY conditioning regimens groups) and controls.**

| A1      |       |       |    |         |                    |         |         |         |        |          |
|---------|-------|-------|----|---------|--------------------|---------|---------|---------|--------|----------|
| Periods | Group | N Obs | N  | Median  | Standard Deviation | IC 95%  |         | Minimum | Median | Maximum  |
|         |       |       |    |         |                    | IL      | SL      |         |        |          |
| Pre     | BEAM  | 7     | 5  | 292.03  | 343.66             | -134.68 | 718.73  | 0.14    | 173.59 | 809.14   |
|         | C     | 18    | 18 | 111.12  | 100.19             | 61.29   | 160.95  | 37.85   | 79.97  | 458.44   |
|         | CY    | 11    | 9  | 2375.25 | 4115.04            | -787.85 | 5538.35 | 53.04   | 433.10 | 11702.09 |
| D+180   | BEAM  | 7     | 7  | 104.79  | 94.82              | 17.09   | 192.48  | 3.01    | 65.91  | 253.13   |
|         | C     | 18    | 0  | .       | .                  | .       | .       | .       | .      | .        |
|         | CY    | 11    | 11 | 1063.19 | 1245.28            | 226.59  | 1899.78 | 194.48  | 540.67 | 4483.33  |
| D+360   | BEAM  | 7     | 7  | 216.07  | 290.09             | -52.22  | 484.36  | 8.07    | 147.22 | 854.38   |
|         | C     | 18    | 0  | .       | .                  | .       | .       | .       | .      | .        |
|         | CY    | 11    | 11 | 928.17  | 857.81             | 351.88  | 1504.45 | 1.93    | 750.51 | 2388.44  |
| D+540   | BEAM  | 7     | 4  | 161.11  | 48.74              | 83.55   | 238.67  | 124.90  | 143.41 | 232.74   |
|         | C     | 18    | 0  | .       | .                  | .       | .       | .       | .      | .        |
|         | CY    | 11    | 9  | 1027.38 | 1232.71            | 79.83   | 1974.93 | 1.19    | 625.59 | 3942.83  |
| D+720   | BEAM  | 7     | 6  | 703.14  | 945.83             | -289.46 | 1695.72 | 115.28  | 374.09 | 2564.01  |
|         | C     | 18    | 0  | .       | .                  | .       | .       | .       | .      | .        |
|         | CY    | 11    | 8  | 1349.65 | 1457.00            | 131.57  | 2567.73 | 256.26  | 790.63 | 4270.52  |

Pre: pre-transplant; BEAM: BCNU. Etoposide. Aracytin and Melphalan; CY: Cyclophosphamide; C; Controls (healthy individuals); IL: inferior limit; SL: superior limit; Obs: observations.

**Table S3. BCL2 gene expression levels of gene in patients at pre- and post- transplantation periods (BEAM or CY conditioning regimens groups) and controls.**

| Periods | Group | N Obs | N  | Median | Standard Deviation | Bcl-2  |        | Minimum | Median | Maximum |
|---------|-------|-------|----|--------|--------------------|--------|--------|---------|--------|---------|
|         |       |       |    |        |                    | IC 95% |        |         |        |         |
|         |       |       |    |        |                    | IL     | SL     |         |        |         |
| Pre     | BEAM  | 7     | 5  | 1.47   | 2.32               | -1.41  | 4.35   | 0.0002  | 0.82   | 5.56    |
|         | C     | 18    | 18 | 72.70  | 99.39              | 23.27  | 122.13 | 0.16    | 24.89  | 354.42  |
|         | CY    | 11    | 9  | 56.09  | 81.92              | -6.88  | 119.05 | 0.39    | 6.33   | 228.85  |
| D+180   | BEAM  | 7     | 7  | 2.05   | 3.23               | -0.93  | 5.038  | 0       | 0.31   | 7.86    |
|         | C     | 18    | 0  | .      | .                  | .      | .      | .       | .      | .       |
|         | CY    | 11    | 11 | 16.52  | 20.38              | 2.83   | 30.21  | 0.18    | 10.22  | 63.05   |
| D+360   | BEAM  | 7     | 7  | 1.46   | 2.22               | -0.59  | 3.51   | 0       | 0.53   | 6.02    |
|         | C     | 18    | 0  | .      | .                  | .      | .      | .       | .      | .       |
|         | CY    | 11    | 11 | 36.73  | 50.79              | 2.60   | 70.85  | 0.50    | 10.92  | 140.24  |
| D+540   | BEAM  | 7     | 4  | 0.85   | 1.12               | -0.93  | 2.63   | 0.08    | 0.40   | 2.51    |
|         | C     | 18    | 0  | .      | .                  | .      | .      | .       | .      | .       |
|         | CY    | 11    | 9  | 25.70  | 28.03              | 4.15   | 47.24  | 1.49    | 8.66   | 66.53   |
| D+720   | BEAM  | 7     | 6  | 77.07  | 166.48             | -97.64 | 251.78 | 0.80    | 12.35  | 416.59  |
|         | C     | 18    | 0  | .      | .                  | .      | .      | .       | .      | .       |
|         | CY    | 11    | 8  | 30.56  | 36.92              | -0.30  | 61.43  | 3.47    | 22.39  | 117.67  |

Pre: pre-transplant; BEAM: BCNU. Etoposide. Aracytin and Melphalan; CY: Cyclophosphamide; C; Controls (healthy individuals); IL: inferior limit; SL: superior limit; Obs: observations.

**Table S4. BCL-W gene expression levels of gene in patients at pre- and post- transplantation periods (BEAM or CY conditioning regimens groups) and controls.**

| Periods | Group | N Obs | N  | Median | Standard Deviation | Bcl-w  |       | Minimum | Median | Maximum |
|---------|-------|-------|----|--------|--------------------|--------|-------|---------|--------|---------|
|         |       |       |    |        |                    | IC 95% |       |         |        |         |
|         |       |       |    |        |                    | IL     | SL    |         |        |         |
| Pre     | BEAM  | 7     | 5  | 0.72   | 0.44               | 0.18   | 1.27  | 0.38    | 0.54   | 1.47    |
|         | C     | 18    | 18 | 2.97   | 2.39               | 1.78   | 4.17  | 0.60    | 2.03   | 8.18    |
|         | CY    | 11    | 9  | 1.99   | 2.35               | 0.19   | 3.80  | 0       | 1.28   | 5.47    |
| D+180   | BEAM  | 7     | 7  | 1.57   | 3.09               | -1.29  | 4.42  | 0       | 0.18   | 8.49    |
|         | C     | 18    | 0  | .      | .                  | .      | .     | .       | .      | .       |
|         | CY    | 11    | 11 | 3.75   | 4.23               | 0.91   | 6.59  | 0.09    | 1.83   | 10.31   |
| D+360   | BEAM  | 7     | 7  | 10.39  | 16.73              | -5.08  | 25.86 | 0.09    | 0.57   | 39.99   |
|         | C     | 18    | 0  | .      | .                  | .      | .     | .       | .      | .       |
|         | CY    | 11    | 11 | 8.83   | 12.13              | 0.69   | 16.98 | 0       | 2.03   | 37.27   |
| D+540   | BEAM  | 7     | 4  | 0.54   | 0.82               | -0.76  | 1.84  | 0       | 0.20   | 1.75    |
|         | C     | 18    | 0  | .      | .                  | .      | .     | .       | .      | .       |
|         | CY    | 11    | 9  | 3.29   | 2.35               | 1.49   | 5.10  | 0.002   | 2.86   | 6.57    |
| D+720   | BEAM  | 7     | 6  | 3.60   | 4.56               | -1.18  | 8.39  | 0       | 1.59   | 11.79   |
|         | C     | 18    | 0  | .      | .                  | .      | .     | .       | .      | .       |
|         | CY    | 11    | 8  | 3.29   | 1.72               | 1.86   | 4.73  | 1.32    | 3.23   | 6.77    |

Pre: pre-transplant; BEAM: BCNU, Etoposide, Aracytin and Melphalan; CY: Cyclophosphamide; C: Controls (healthy individuals); IL: inferior limit; SL: superior limit; Obs: observations.

**Table S5. BCL-XL gene expression levels of gene in patients at pre- and post- transplantation periods (BEAM or CY conditioning regimens groups) and controls.**

| Bcl-xL  |       |       |    |         |                    |          |         |         |        |          |
|---------|-------|-------|----|---------|--------------------|----------|---------|---------|--------|----------|
| Periods | Group | N Obs | N  | Median  | Standard Deviation | IC 95%   |         | Minimum | Median | Maximum  |
|         |       |       |    |         |                    | IL       | SL      |         |        |          |
| Pre     | BEAM  | 7     | 5  | 45.59   | 15.10              | 26.84    | 64.35   | 24.91   | 47.52  | 63.77    |
|         | C     | 18    | 18 | 287.66  | 177.35             | 199.47   | 375.86  | 25.54   | 232.31 | 653.43   |
|         | CY    | 11    | 9  | 377.49  | 623.23             | -101.57  | 856.55  | 77.63   | 93.57  | 1984.59  |
| D+180   | BEAM  | 7     | 7  | 122.03  | 170.84             | -35.97   | 280.04  | 5.17    | 73.24  | 504.59   |
|         | C     | 18    | 0  | .       | .                  | .        | .       | .       | .      | .        |
|         | CY    | 11    | 11 | 175.93  | 100.15             | 108.65   | 243.21  | 76.89   | 148.06 | 427.76   |
| D+360   | BEAM  | 7     | 7  | 197.88  | 359.53             | -134.63  | 530.39  | 10.68   | 66.68  | 1008.16  |
|         | C     | 18    | 0  | .       | .                  | .        | .       | .       | .      | .        |
|         | CY    | 11    | 11 | 1860.66 | 5406.55            | -1771.51 | 5492.82 | 87.31   | 164.55 | 18154.85 |
| D+540   | BEAM  | 7     | 4  | 45.74   | 12.01              | 26.62    | 64.85   | 34.68   | 44.08  | 60.11    |
|         | C     | 18    | 0  | .       | .                  | .        | .       | .       | .      | .        |
|         | CY    | 11    | 9  | 99.54   | 77.03              | 40.33    | 158.75  | 28.39   | 81.75  | 247.49   |
| D+720   | BEAM  | 7     | 6  | 898.69  | 1587.90            | -767.71  | 2565.09 | 80.35   | 295.26 | 4117.01  |
|         | C     | 18    | 0  | .       | .                  | .        | .       | .       | .      | .        |
|         | CY    | 11    | 8  | 119.14  | 57.86              | 70.78    | 167.51  | 35.12   | 110.21 | 190.81   |

Pre: pre-transplant; BEAM: BCNU, Etoposide, Aracytin and Melphalan; CY: Cyclophosphamide; C: Controls (healthy individuals); IL: inferior limit; SL: superior limit; Obs: observations.



**Table S6. MCL-1 gene expression levels of gene in patients at pre- and post- transplantation periods (BEAM or CY conditioning regimens groups) and controls.**

| Mcl_1   |       |       |    |          |                    |           |          |         |          |          |
|---------|-------|-------|----|----------|--------------------|-----------|----------|---------|----------|----------|
| Periods | Group | N Obs | N  | Median   | Standard Deviation | IC 95%    |          | Minimum | Median   | Maximum  |
|         |       |       |    |          |                    | IL        | SL       |         |          |          |
| Pre     | BEAM  | 7     | 5  | 5495.59  | 4753.47            | -406.62   | 11397.80 | 366.65  | 7012.92  | 10063.51 |
|         | C     | 18    | 18 | 8194.19  | 4344.49            | 6033.73   | 10354.66 | 2348.79 | 7537.15  | 18245.09 |
|         | CY    | 11    | 9  | 6307.13  | 4941.27            | 2508.94   | 10105.32 | 23.91   | 6462.42  | 13240.66 |
| D+180   | BEAM  | 7     | 7  | 5158.56  | 3016.58            | 2368.68   | 7948.43  | 425.35  | 5165.38  | 10092.59 |
|         | C     | 18    | 0  | .        | .                  | .         | .        | .       | .        | .        |
|         | CY    | 11    | 11 | 13304.11 | 8970.25            | 7277.81   | 19330.40 | 4220.11 | 10833.83 | 34616.83 |
| D+360   | BEAM  | 7     | 7  | 18566.43 | 28898.64           | -8160.36  | 45293.22 | 19.32   | 9021.90  | 83464.62 |
|         | C     | 18    | 0  | .        | .                  | .         | .        | .       | .        | .        |
|         | CY    | 11    | 11 | 8094.04  | 4621.29            | 4989.40   | 11198.67 | 3.78    | 9046.91  | 14022.71 |
| D+540   | BEAM  | 7     | 4  | 7555.39  | 1876.97            | 4568.71   | 10542.08 | 5770.89 | 7590.34  | 9270.01  |
|         | C     | 18    | 0  | .        | .                  | .         | .        | .       | .        | .        |
|         | CY    | 11    | 9  | 10089.98 | 8994.58            | 3176.13   | 17003.82 | 0.99    | 8297.94  | 31180.72 |
| D+720   | BEAM  | 7     | 6  | 9998.22  | 9849.23            | -337.9137 | 20334.36 | 3276.17 | 5803.76  | 28422.63 |
|         | C     | 18    | 0  | .        | .                  | .         | .        | .       | .        | .        |
|         | CY    | 11    | 8  | 7034.14  | 6841.52            | 1314.4912 | 12753.79 | 1737.89 | 4845.18  | 23031.89 |

Pre: pre-transplant; BEAM: BCNU. Etoposide. Aracytin and Melphalan; CY: Cyclophosphamide; C; Controls (healthy individuals); IL: inferior limit; SL: superior limit; Obs: observations.

**Table S7. C-FLIP gene expression levels of gene in patients at pre- and post- transplantation periods (BEAM or CY conditioning regimens groups) and controls.**

| Periods | Group | N Obs | N  | Median | Standard Deviation | c_Flip |        | Minimum | Median | Maximum |
|---------|-------|-------|----|--------|--------------------|--------|--------|---------|--------|---------|
|         |       |       |    |        |                    | IC 95% |        |         |        |         |
|         |       |       |    |        |                    | IL     | SL     |         |        |         |
| Pre     | BEAM  | 7     | 5  | 64.45  | 109.54             | -71.55 | 200.46 | 0.003   | 21.00  | 259.40  |
|         | C     | 18    | 18 | 116.26 | 85.82              | 73.57  | 158.94 | 16.52   | 96.84  | 319.93  |
|         | CY    | 11    | 9  | 118.13 | 118.23             | 27.24  | 209.01 | 0.75    | 118.99 | 338.18  |
| D+180   | BEAM  | 7     | 7  | 26.82  | 24.96              | 3.74   | 49.91  | 0.03    | 16.79  | 66.18   |
|         | C     | 18    | 0  | .      | .                  | .      | .      | .       | .      | .       |
|         | CY    | 11    | 11 | 190.61 | 119.36             | 110.42 | 270.79 | 73.16   | 167.68 | 445.62  |
| D+360   | BEAM  | 7     | 7  | 171.99 | 218.73             | -30.31 | 374.28 | 10.85   | 95.65  | 644.81  |
|         | C     | 18    | 0  | .      | .                  | .      | .      | .       | .      | .       |
|         | CY    | 11    | 11 | 166.76 | 131.31             | 78.55  | 254.97 | 5.32    | 118.88 | 427.21  |
| D+540   | BEAM  | 7     | 4  | 103.75 | 30.26              | 55.59  | 151.91 | 77.09   | 96.68  | 144.56  |
|         | C     | 18    | 0  | .      | .                  | .      | .      | .       | .      | .       |
|         | CY    | 11    | 9  | 459.84 | 487.58             | 85.05  | 834.63 | 0.14    | 196.99 | 1261.78 |
| D+720   | BEAM  | 7     | 6  | 80.81  | 116.57             | -41.53 | 203.15 | 0.0001  | 22.26  | 287.77  |
|         | C     | 18    | 0  | .      | .                  | .      | .      | .       | .      | .       |
|         | CY    | 11    | 8  | 676.92 | 337.28             | 394.94 | 958.89 | 345.03  | 595.16 | 1360.43 |

Pre: pre-transplant; BEAM: BCNU. Etoposide. Aracytin and Melphalan; CY: Cyclophosphamide; C; Controls (healthy individuals); IL: inferior limit; SL: superior limit; Obs: observations.

**Table S8. cIAP-1 gene expression levels of gene in patients at pre- and post- transplantation periods (BEAM or CY conditioning regimens groups) and controls.**

| cIAP-1  |       |       |    |        |                    |         |        |         |        |         |
|---------|-------|-------|----|--------|--------------------|---------|--------|---------|--------|---------|
| Periods | Group | N Obs | N  | Median | Standard Deviation | IC 95%  |        | Minimum | Median | Maximum |
|         |       |       |    |        |                    | IL      | SL     |         |        |         |
| Pre     | BEAM  | 7     | 5  | 30.90  | 31.61              | -8.35   | 70.16  | 7.39    | 14.73  | 80.49   |
|         | C     | 18    | 18 | 75.26  | 73.38              | 38.77   | 111.75 | 4.23    | 54.13  | 292.45  |
|         | CY    | 11    | 9  | 44.05  | 66.01              | -6.69   | 94.78  | 0.25    | 6.09   | 180.78  |
| D+180   | BEAM  | 7     | 7  | 12.68  | 13.52              | 0.18    | 25.19  | 3.07    | 7.97   | 41.12   |
|         | C     | 18    | 0  | .      | .                  | .       | .      | .       | .      | .       |
|         | CY    | 11    | 11 | 87.84  | 52.12              | 52.83   | 122.85 | 29.55   | 62.03  | 181.77  |
| D+360   | BEAM  | 7     | 7  | 21.17  | 30.23              | -6.79   | 49.12  | 1.69    | 10.15  | 88.24   |
|         | C     | 18    | 0  | .      | .                  | .       | .      | .       | .      | .       |
|         | CY    | 11    | 11 | 162.15 | 272.96             | -21.23  | 345.53 | 0.62    | 78.44  | 959.72  |
| D+540   | BEAM  | 7     | 4  | 37.09  | 19.95              | 5.35    | 68.83  | 19.49   | 31.55  | 65.76   |
|         | C     | 18    | 0  | .      | .                  | .       | .      | .       | .      | .       |
|         | CY    | 11    | 9  | 294.51 | 593.43             | -161.64 | 750.66 | 5.28    | 46.34  | 1854.92 |
| D+720   | BEAM  | 7     | 6  | 105.59 | 118.84             | -19.12  | 230.32 | 6.49    | 62.89  | 334.41  |
|         | C     | 18    | 0  | .      | .                  | .       | .      | .       | .      | .       |
|         | CY    | 11    | 8  | 250.49 | 228.41             | 59.54   | 441.45 | 16.41   | 175.34 | 628.    |

Pre: pre-transplant; BEAM: BCNU. Etoposide. Aracytin and Melphalan; CY: Cyclophosphamide; C; Controls (healthy individuals); IL: inferior limit; SL: superior limit; Obs: observations.

**Table S9. cIAP-2 gene expression levels of gene in patients at pre- and post- transplantation periods (BEAM or CY conditioning regimens groups) and controls.**

| cIAP-2  |       |       |    |         |                    |          |         |         |         |         |
|---------|-------|-------|----|---------|--------------------|----------|---------|---------|---------|---------|
| Periods | Group | N Obs | N  | Median  | Standard Deviation | IC 95%   |         | Minimum | Median  | Maximum |
|         |       |       |    |         |                    | IL       | SL      |         |         |         |
| Pre     | BEAM  | 7     | 5  | 227.91  | 255.17             | -88.92   | 544.75  | 0.17    | 232.74  | 638.97  |
|         | C     | 18    | 18 | 150.15  | 107.17             | 96.85    | 203.44  | 14.14   | 125.44  | 470.35  |
|         | CY    | 11    | 9  | 652.13  | 1200.84            | -270.92  | 1575.18 | 0.05    | 319.03  | 3833.25 |
| D+180   | BEAM  | 7     | 7  | 467.31  | 940.02             | -402.07  | 1336.68 | 18.79   | 60.21   | 2577.51 |
|         | C     | 18    | 0  | .       | .                  | .        | .       | .       | .       | .       |
|         | CY    | 11    | 11 | 1199.28 | 1546.15            | 160.56   | 2237.99 | 147.04  | 429.83  | 4422.49 |
| D+360   | BEAM  | 7     | 7  | 1673.13 | 3343.66            | -1419.24 | 4765.50 | 28.62   | 361.69  | 9214.73 |
|         | C     | 18    | 0  | .       | .                  | .        | .       | .       | .       | .       |
|         | CY    | 11    | 11 | 377.01  | 333.49             | 152.98   | 601.05  | 0.01    | 277.72  | 1004.29 |
| D+540   | BEAM  | 7     | 4  | 1328.03 | 1358.61            | -833.81  | 3489.88 | 93.23   | 1345.91 | 2527.08 |
|         | C     | 18    | 0  | .       | .                  | .        | .       | .       | .       | .       |
|         | CY    | 11    | 9  | 1049.93 | 1335.72            | 23.21    | 2076.66 | 25.17   | 259.29  | 3400.63 |
| D+720   | BEAM  | 7     | 6  | 503.74  | 366.31             | 119.32   | 888.16  | 2.21    | 602.18  | 985.31  |
|         | C     | 18    | 0  | .       | .                  | .        | .       | .       | .       | .       |
|         | CY    | 11    | 8  | 1011.57 | 766.47             | 370.79   | 1652.36 | 88.07   | 803.22  | 2469.74 |

Pre: pre-transplant; BEAM: BCNU, Etoposide, Aracytin and Melphalan; CY: Cyclophosphamide; C: Controls (healthy individuals); IL: inferior limit; SL: superior limit; Obs: observations.

**Table S10. BAD gene expression levels of gene in patients at pre- and post- transplantation periods (BEAM or CY conditioning regimens groups) and controls.**

| Descriptivas : Bad |       |          |    |        |                       |         |        |         |        |         |
|--------------------|-------|----------|----|--------|-----------------------|---------|--------|---------|--------|---------|
| Periods            | Group | N<br>Obs | N  | Median | Standard<br>Deviation | IC 95%  |        | Minimum | Median | Maximum |
|                    |       |          |    |        |                       | IL      | SL     |         |        |         |
| Pre                | BEAM  | 7        | 5  | 0.04   | 0.06                  | -0.04   | 0.11   | 0       | 0      | 0.14    |
|                    | C     | 18       | 18 | 2.89   | 3.51                  | 1.15    | 4.64   | 0.05    | 1.42   | 11.22   |
|                    | CY    | 11       | 9  | 1.35   | 1.76                  | -0.0001 | 2.70   | 0       | 0.07   | 4.37    |
| D+180              | BEAM  | 7        | 7  | 0.01   | 0.017                 | -0.01   | 0.02   | 0       | 0      | 0.04    |
|                    | C     | 18       | 0  | .      | .                     | .       | .      | .       | .      | .       |
|                    | CY    | 11       | 11 | 1.75   | 3.06                  | -0.30   | 3.80   | 0       | 0.66   | 9.69    |
| D+360              | BEAM  | 7        | 7  | 0.07   | 0.17                  | -0.09   | 0.23   | 0       | 0.0001 | 0.46    |
|                    | C     | 18       | 0  | .      | .                     | .       | .      | .       | .      | .       |
|                    | CY    | 11       | 11 | 1.28   | 1.71                  | 0.14    | 2.43   | 0       | 0.75   | 4.71    |
| D+540              | BEAM  | 7        | 4  | 0.0001 | 0.0001                | -0.0002 | 0.0003 | 0       | 0      | 0.0003  |
|                    | C     | 18       | 0  | .      | .                     | .       | .      | .       | .      | .       |
|                    | CY    | 11       | 9  | 1.04   | 1.15                  | 0.16    | 1.92   | 0       | 0.55   | 2.67    |
| D+720              | BEAM  | 7        | 6  | 0.01   | 0.01                  | -0.001  | 0.02   | 0       | 0.01   | 0.02    |
|                    | C     | 18       | 0  | .      | .                     | .       | .      | .       | .      | .       |
|                    | CY    | 11       | 8  | 1.67   | 1.83                  | 0.14    | 3.20   | 0.30    | 0.89   | 5.82    |

Pre: pre-transplant; BEAM: BCNU. Etoposide. Aracytin and Melphalan; CY: Cyclophosphamide; C; Controls (healthy individuals); IL: inferior limit; SL: superior limit; Obs: observations.

**Table S11. BAK gene expression levels of gene in patients at pre- and post- transplantation periods (BEAM or CY conditioning regimens groups) and controls.**

| Bak     |       |       |    |        |                    |         |         |         |        |         |
|---------|-------|-------|----|--------|--------------------|---------|---------|---------|--------|---------|
| Periods | Group | N Obs | N  | Median | Standard Deviation | IC 95%  |         | Minimum | Median | Maximum |
|         |       |       |    |        |                    | IL      | SL      |         |        |         |
| Pre     | BEAM  | 7     | 5  | 7.10   | 6.05               | -0.41   | 14.60   | 0       | 5.41   | 15.97   |
|         | C     | 18    | 18 | 166.75 | 149.85             | 92.24   | 241.27  | 0.01    | 139.96 | 429.02  |
|         | CY    | 11    | 9  | 135.35 | 178.27             | -1.68   | 272.38  | 1.14    | 47.19  | 528.77  |
| D+180   | BEAM  | 7     | 7  | 13.99  | 15.39              | -0.24   | 28.22   | 0.67    | 11.21  | 46.55   |
|         | C     | 18    | 0  | .      | .                  | .       | .       | .       | .      | .       |
|         | CY    | 11    | 11 | 177.96 | 157.76             | 71.97   | 283.94  | 10.52   | 166.38 | 459.10  |
| D+360   | BEAM  | 7     | 7  | 51.57  | 88.83              | -30.58  | 133.72  | 0       | 12.54  | 246.52  |
|         | C     | 18    | 0  | .      | .                  | .       | .       | .       | .      | .       |
|         | CY    | 11    | 11 | 310.04 | 425.08             | 24.46   | 595.61  | 12.53   | 193.21 | 1498.39 |
| D+540   | BEAM  | 7     | 4  | 180.16 | 339.30             | -359.74 | 720.07  | 5.42    | 13.08  | 689.08  |
|         | C     | 18    | 0  | .      | .                  | .       | .       | .       | .      | .       |
|         | CY    | 11    | 9  | 319.19 | 408.07             | 5.53    | 632.86  | 3.74    | 155.59 | 1210.29 |
| D+720   | BEAM  | 7     | 6  | 810.27 | 833.95             | -64.91  | 1685.45 | 0.02    | 603.48 | 2394.04 |
|         | C     | 18    | 0  | .      | .                  | .       | .       | .       | .      | .       |
|         | CY    | 11    | 8  | 111.78 | 57.62              | 63.61   | 159.95  | 27.74   | 127.25 | 196.21  |

Pre: pre-transplant; BEAM: BCNU, Etoposide, Aracytin and Melphalan; CY: Cyclophosphamide; C: Controls (healthy individuals); IL: inferior limit; SL: superior limit; Obs: observations.

**Table S12. BAX gene expression levels of gene in patients at pre- and post- transplantation periods (BEAM or CY conditioning regimens groups) and controls.**

| Bax     |       |       |    |        |                    |        |       |         |        |         |
|---------|-------|-------|----|--------|--------------------|--------|-------|---------|--------|---------|
| Periods | Group | N Obs | N  | Median | Standard Deviation | IC 95% |       | Minimum | Median | Maximum |
|         |       |       |    |        |                    | IL     | SL    |         |        |         |
| Pre     | BEAM  | 7     | 5  | 0.001  | 0.002              | -0.001 | 0.003 | 0       | 0      | 0.003   |
|         | C     | 18    | 18 | 13.09  | 13.91              | 6.17   | 20.01 | 0.08    | 9.62   | 45.13   |
|         | CY    | 11    | 9  | 9.18   | 13.14              | -0.92  | 19.28 | 0       | 0.01   | 35.49   |
| D+180   | BEAM  | 7     | 7  | 0      | 0                  | .      | .     | 0       | 0      | 0       |
|         | C     | 18    | 0  | .      | .                  | .      | .     | .       | .      | .       |
|         | CY    | 11    | 11 | 10.64  | 12.14              | 2.48   | 18.79 | 0       | 8.32   | 28.98   |
| D+360   | BEAM  | 7     | 7  | 0.16   | 0.42               | -0.23  | 0.55  | 0       | 0      | 1.11    |
|         | C     | 18    | 0  | .      | .                  | .      | .     | .       | .      | .       |
|         | CY    | 11    | 11 | 10.06  | 10.02              | 3.33   | 16.78 | 0       | 7.51   | 35.36   |
| D+540   | BEAM  | 7     | 4  | 0      | 0                  | .      | .     | 0       | 0      | 0       |
|         | C     | 18    | 0  | .      | .                  | .      | .     | .       | .      | .       |
|         | CY    | 11    | 9  | 14.69  | 15.55              | 2.73   | 26.64 | 0       | 5.98   | 46.95   |
| D+720   | BEAM  | 7     | 6  | 1.22   | 2.99               | -1.91  | 4.35  | 0       | 0      | 7.31    |
|         | C     | 18    | 0  | .      | .                  | .      | .     | .       | .      | .       |
|         | CY    | 11    | 8  | 17.78  | 10.57              | 8.94   | 26.61 | 3.14    | 21.23  | 29.37   |

Pre: pre-transplant; BEAM: BCNU, Etoposide, Aracytin and Melphalan; CY: Cyclophosphamide; C: Controls (healthy individuals); IL: inferior limit; SL: superior limit; Obs: observations.

**Table S13. BID gene expression levels of gene in patients at pre- and post- transplantation periods (BEAM or CY conditioning regimens groups) and controls.**

| Periods | Group | N Obs | N  | Median  | Standard Deviation | IC 95%   |          | Minimum | Median  | Maximum  |
|---------|-------|-------|----|---------|--------------------|----------|----------|---------|---------|----------|
|         |       |       |    |         |                    | Bid      |          |         |         |          |
|         |       |       |    |         |                    | IL       | SL       |         |         |          |
| Pre     | BEAM  | 7     | 5  | 698.39  | 641.12             | -97.67   | 1494.45  | 27.26   | 810.54  | 1570.76  |
|         | C     | 18    | 18 | 26.68   | 39.99              | 6.79     | 46.56    | 2.01    | 13.49   | 178.04   |
|         | CY    | 11    | 9  | 390.39  | 738.98             | -177.63  | 958.42   | 1.74    | 58.01   | 2122.36  |
| D+180   | BEAM  | 7     | 7  | 447.69  | 355.88             | 118.56   | 776.83   | 109.54  | 471.97  | 1069.05  |
|         | C     | 18    | 0  | .       | .                  | .        | .        | .       | .       | .        |
|         | CY    | 11    | 11 | 2546.08 | 3580.43            | 140.72   | 4951.44  | 43.31   | 1617.28 | 12528.53 |
| D+360   | BEAM  | 7     | 7  | 6483.03 | 15568.04           | -7915.00 | 20881.06 | 14.94   | 391.85  | 41752.56 |
|         | C     | 18    | 0  | .       | .                  | .        | .        | .       | .       | .        |
|         | CY    | 11    | 11 | 1764.91 | 3009.93            | -257.18  | 3787.01  | 33.89   | 469.74  | 9892.50  |
| D+540   | BEAM  | 7     | 4  | 1772.63 | 1160.74            | -74.37   | 3619.63  | 565.54  | 1696.85 | 3131.27  |
|         | C     | 18    | 0  | .       | .                  | .        | .        | .       | .       | .        |
|         | CY    | 11    | 9  | 454.25  | 560.59             | 23.34    | 885.16   | 22.99   | 143.33  | 1709.36  |
| D+720   | BEAM  | 7     | 6  | 1164.05 | 1141.51            | -33.89   | 2361.99  | 101.53  | 873.80  | 3393.20  |
|         | C     | 18    | 0  | .       | .                  | .        | .        | .       | .       | .        |
|         | CY    | 11    | 8  | 189.69  | 93.86              | 111.22   | 268.16   | 39.41   | 203.46  | 311.20   |

Pre: pre-transplant; BEAM: BCNU, Etoposide, Aracytin and Melphalan; CY: Cyclophosphamide; C: Controls (healthy individuals); IL: inferior limit; SL: superior limit; Obs: observations.



**Table S14. BIK gene expression levels of gene in patients at pre- and post- transplantation periods (BEAM or CY conditioning regimens groups) and controls.**

| Periods | Group | N Obs | N  | Median | Standard Deviation | Bik    |       | Minimum | Median | Maximum |
|---------|-------|-------|----|--------|--------------------|--------|-------|---------|--------|---------|
|         |       |       |    |        |                    | IC 95% |       |         |        |         |
|         |       |       |    |        |                    | IL     | SL    |         |        |         |
| Pre     | BEAM  | 7     | 5  | 2.85   | 5.03               | -3.39  | 9.09  | 0.04    | 0.75   | 11.81   |
|         | C     | 18    | 18 | 2.26   | 1.39               | 1.57   | 2.95  | 0.01    | 1.99   | 4.83    |
|         | CY    | 11    | 9  | 4.54   | 2.10               | 2.92   | 6.16  | 0.77    | 4.43   | 8.35    |
| D+180   | BEAM  | 7     | 7  | 4.91   | 2.89               | 2.24   | 7.58  | 0.51    | 5.41   | 8.81    |
|         | C     | 18    | 0  | .      | .                  | .      | .     | .       | .      | .       |
|         | CY    | 11    | 11 | 5.85   | 8.68               | 0.024  | 11.68 | 0.40    | 3.84   | 30.77   |
| D+360   | BEAM  | 7     | 7  | 3.09   | 2.76               | 0.53   | 5.64  | 1.16    | 1.85   | 7.59    |
|         | C     | 18    | 0  | .      | .                  | .      | .     | .       | .      | .       |
|         | CY    | 11    | 11 | 17.78  | 46.62              | -13.54 | 49.11 | 0.65    | 3.21   | 158.15  |
| D+540   | BEAM  | 7     | 4  | 8.26   | 12.64              | -11.86 | 28.38 | 1.23    | 2.31   | 27.21   |
|         | C     | 18    | 0  | .      | .                  | .      | .     | .       | .      | .       |
|         | CY    | 11    | 9  | 6.63   | 7.50               | 0.87   | 12.39 | 0.41    | 3.76   | 24.20   |
| D+720   | BEAM  | 7     | 6  | 6.56   | 5.29               | 1.01   | 12.11 | 1.25    | 4.39   | 14.75   |
|         | C     | 18    | 0  | .      | .                  | .      | .     | .       | .      | .       |
|         | CY    | 11    | 8  | 1.41   | 1.27               | 0.35   | 2.47  | 0.02    | 1.29   | 3.44    |

Pre: pre-transplant; BEAM: BCNU, Etoposide, Aracytin and Melphalan; CY: Cyclophosphamide; C: Controls (healthy individuals); IL: inferior limit; SL: superior limit; Obs: observations.

**Table S15. BIMEL gene expression levels of gene in patients at pre- and post- transplantation periods (BEAM or CY conditioning regimens groups) and controls.**

| Periods | Group | N Obs | N  | Median | Standard Deviation | BimEL   |         | Minimum | Median | Maximum |
|---------|-------|-------|----|--------|--------------------|---------|---------|---------|--------|---------|
|         |       |       |    |        |                    | IC 95%  |         |         |        |         |
|         |       |       |    |        |                    | IL      | SL      |         |        |         |
| Pre     | BEAM  | 7     | 5  | 29.27  | 23.61              | -0.04   | 58.58   | 1.01    | 28.49  | 60.21   |
|         | C     | 18    | 18 | 27.85  | 15.87              | 19.96   | 35.75   | 9.01    | 23.78  | 65.41   |
|         | CY    | 11    | 9  | 416.32 | 1058.97            | -397.68 | 1230.31 | 0.20    | 100.33 | 3235.79 |
| D+180   | BEAM  | 7     | 7  | 42.72  | 45.55              | 0.59    | 84.85   | 6.70    | 28.51  | 141.39  |
|         | C     | 18    | 0  | .      | .                  | .       | .       | .       | .      | .       |
|         | CY    | 11    | 11 | 64.64  | 41.67              | 36.65   | 92.63   | 27.48   | 57.95  | 182.38  |
| D+360   | BEAM  | 7     | 7  | 68.63  | 99.94              | -23.79  | 161.06  | 3.61    | 31.57  | 290.57  |
|         | C     | 18    | 0  | .      | .                  | .       | .       | .       | .      | .       |
|         | CY    | 11    | 11 | 79.81  | 60.03              | 39.48   | 120.14  | 7.19    | 68.46  | 204.49  |
| D+540   | BEAM  | 7     | 4  | 37.86  | 23.33              | 0.74    | 74.99   | 13.16   | 37.65  | 62.70   |
|         | C     | 18    | 0  | .      | .                  | .       | .       | .       | .      | .       |
|         | CY    | 11    | 9  | 196.24 | 386.67             | -100.98 | 493.46  | 8.41    | 44.85  | 1209.48 |
| D+720   | BEAM  | 7     | 6  | 197.19 | 181.70             | 6.51    | 387.87  | 34.02   | 172.69 | 532.75  |
|         | C     | 18    | 0  | .      | .                  | .       | .       | .       | .      | .       |
|         | CY    | 11    | 8  | 142.52 | 132.09             | 32.09   | 252.95  | 16.18   | 118.77 | 449.24  |

Pre: pre-transplant; BEAM: BCNU, Etoposide, Aracytin and Melphalan; CY: Cyclophosphamide; C; Controls (healthy individuals); IL: inferior limit; SL: superior limit; Obs: observations.

**Table S16. BOK gene expression levels of gene in patients at pre- and post- transplantation periods (BEAM or CY conditioning regimens groups) and controls.**

| Periods | Group | N Obs | N  | Median | Standard Deviation | Bok     |        | Minimum | Median | Maximum   |
|---------|-------|-------|----|--------|--------------------|---------|--------|---------|--------|-----------|
|         |       |       |    |        |                    | IC 95%  |        |         |        |           |
|         |       |       |    |        |                    | IL      | SL     |         |        |           |
| Pre     | BEAM  | 7     | 5  | 209.90 | 428.63             | -322.31 | 742.11 | 9.18    | 22.96  | 976.5645  |
|         | C     | 18    | 18 | 2.02   | 2.17               | 0.94    | 3.10   | 0.002   | 1.49   | 7.7893    |
|         | CY    | 11    | 9  | 3.01   | 2.11               | 1.38    | 4.63   | 0.5584  | 1.98   | 6.9101    |
| D+180   | BEAM  | 7     | 7  | 326.70 | 647.92             | -272.53 | 925.93 | 4.60    | 13.31  | 1739.7948 |
|         | C     | 18    | 0  | .      | .                  | .       | .      | .       | .      | .         |
|         | CY    | 11    | 11 | 51.09  | 86.49              | -7.01   | 109.20 | 0.28    | 1.78   | 222.3663  |
| D+360   | BEAM  | 7     | 7  | 100.13 | 161.24             | -48.99  | 249.25 | 10.79   | 36.20  | 460.4204  |
|         | C     | 18    | 0  | .      | .                  | .       | .      | .       | .      | .         |
|         | CY    | 11    | 11 | 150.85 | 324.39             | -67.08  | 368.78 | 0.002   | 6.63   | 963.8325  |
| D+540   | BEAM  | 7     | 4  | 53.21  | 60.65              | -43.31  | 149.72 | 0.90    | 42.56  | 126.8039  |
|         | C     | 18    | 0  | .      | .                  | .       | .      | .       | .      | .         |
|         | CY    | 11    | 9  | 10.24  | 22.80              | -7.28   | 27.76  | 0.001   | 2.42   | 70.5923   |
| D+720   | BEAM  | 7     | 6  | 8.31   | 15.61              | -8.08   | 24.69  | 0.41    | 1.67   | 40.014    |
|         | C     | 18    | 0  | .      | .                  | .       | .      | .       | .      | .         |
|         | CY    | 11    | 8  | 29.54  | 44.24              | -7.45   | 66.53  | 0.03    | 2.05   | 109.9989  |

Pre: pre-transplant; BEAM: BCNU. Etoposide. Aracytin and Melphalan; CY: Cyclophosphamide; C; Controls (healthy individuals); IL: inferior limit; SL: superior limit; Obs: observations.

**Table S17. NOXA gene expression levels of gene in patients at pre- and post- transplantation periods (BEAM or CY conditioning regimens groups) and controls.**

| Periods | Group | N Obs | N  | Median | Standard Deviation | Noxa   |        | Minimum | Median | Maximum |
|---------|-------|-------|----|--------|--------------------|--------|--------|---------|--------|---------|
|         |       |       |    |        |                    | IC 95% |        |         |        |         |
|         |       |       |    |        |                    | IL     | SL     |         |        |         |
| Pre     | BEAM  | 7     | 5  | 19.34  | 36.14              | -25.53 | 64.22  | 0.14    | 5.87   | 83.80   |
|         | C     | 18    | 18 | 82.41  | 139.06             | 13.26  | 151.57 | 0.28    | 17.56  | 512.53  |
|         | CY    | 11    | 9  | 23.15  | 33.46              | -2.57  | 48.87  | 1.53    | 9.63   | 89.41   |
| D+180   | BEAM  | 7     | 7  | 6.49   | 9.19               | -2.01  | 14.99  | 0.006   | 3.92   | 26.70   |
|         | C     | 18    | 0  | .      | .                  | .      | .      | .       | .      | .       |
|         | CY    | 11    | 11 | 50.16  | 71.37              | 2.22   | 98.11  | 3.35    | 23.75  | 238.92  |
| D+360   | BEAM  | 7     | 7  | 8.54   | 5.72               | 3.25   | 13.83  | 1.34    | 10.32  | 15.94   |
|         | C     | 18    | 0  | .      | .                  | .      | .      | .       | .      | .       |
|         | CY    | 11    | 11 | 18.53  | 15.25              | 8.29   | 28.78  | 0.91    | 12.26  | 48.39   |
| D+540   | BEAM  | 7     | 4  | 7.41   | 3.77               | 1.41   | 13.41  | 3.11    | 7.82   | 10.89   |
|         | C     | 18    | 0  | .      | .                  | .      | .      | .       | .      | .       |
|         | CY    | 11    | 9  | 26.58  | 23.84              | 8.25   | 44.91  | 0.03    | 22.50  | 56.84   |
| D+720   | BEAM  | 7     | 6  | 14.33  | 21.22              | -7.95  | 36.60  | 0.01    | 6.92   | 56.58   |
|         | C     | 18    | 0  | .      | .                  | .      | .      | .       | .      | .       |
|         | CY    | 11    | 8  | 20.27  | 16.71              | 6.30   | 34.24  | 3.31    | 15.12  | 42.70   |

Pre: pre-transplant; BEAM: BCNU. Etoposide. Aracytin and Melphalan; CY: Cyclophosphamide; C; Controls (healthy individuals); IL: inferior limit; SL: superior limit; Obs: observations.

**Table S18. FAS gene expression levels of gene in patients at pre- and post- transplantation periods (BEAM or CY conditioning regimens groups) and controls.**

| Periods | Group | N Obs | N  | Fas    |                    |        |        |         |        |         |
|---------|-------|-------|----|--------|--------------------|--------|--------|---------|--------|---------|
|         |       |       |    | Median | Standard Deviation | IC 95% |        | Minimum | Median | Maximum |
|         |       |       |    |        |                    | IL     | SL     |         |        |         |
| Pre     | BEAM  | 7     | 5  | 48.35  | 33.45              | 6.82   | 89.88  | 0.14    | 53.66  | 88.50   |
|         | C     | 18    | 18 | 78.85  | 43.20              | 57.36  | 100.33 | 16.84   | 76.42  | 192.53  |
|         | CY    | 11    | 9  | 277.99 | 272.63             | 68.44  | 487.56 | 1.10    | 145.77 | 749.53  |
| D+180   | BEAM  | 7     | 7  | 97.28  | 61.03              | 40.84  | 153.72 | 3.41    | 109.22 | 198.59  |
|         | C     | 18    | 0  | .      | .                  | .      | .      | .       | .      | .       |
|         | CY    | 11    | 11 | 278.55 | 223.24             | 128.58 | 428.52 | 40.75   | 258.70 | 707.71  |
| D+360   | BEAM  | 7     | 7  | 119.86 | 87.66              | 38.79  | 200.94 | 47.98   | 91.57  | 308.57  |
|         | C     | 18    | 0  | .      | .                  | .      | .      | .       | .      | .       |
|         | CY    | 11    | 11 | 305.07 | 307.66             | 98.38  | 511.75 | 0       | 159.51 | 934.24  |
| D+540   | BEAM  | 7     | 4  | 191.81 | 48.69              | 114.33 | 269.30 | 157.20  | 174.71 | 260.62  |
|         | C     | 18    | 0  | .      | .                  | .      | .      | .       | .      | .       |
|         | CY    | 11    | 9  | 203.52 | 209.32             | 42.62  | 364.41 | 0.037   | 140.87 | 604.41  |
| D+720   | BEAM  | 7     | 6  | 187.85 | 142.77             | 38.01  | 337.68 | 0.17    | 225.95 | 348.50  |
|         | C     | 18    | 0  | .      | .                  | .      | .      | .       | .      | .       |
|         | CY    | 11    | 8  | 143.28 | 104.25             | 56.12  | 230.44 | 40.38   | 110.28 | 357.09  |

Pre: pre-transplant; BEAM: BCNU. Etoposide. Aracytin and Melphalan; CY: Cyclophosphamide; C; Controls (healthy individuals); IL: inferior limit; SL: superior limit; Obs: observations.

**Table S19. FASL gene expression levels of gene in patients at pre- and post- transplantation periods (BEAM or CY conditioning regimens groups) and controls.**

| Periods | Group | N Obs | N  | FasL   |                    |        |       |         |        |         |
|---------|-------|-------|----|--------|--------------------|--------|-------|---------|--------|---------|
|         |       |       |    | Median | Standard Deviation | IC 95% |       | Minimum | Median | Maximum |
|         |       |       |    |        |                    | IL     | SL    |         |        |         |
| Pre     | BEAM  | 7     | 5  | 6.92   | 6.64               | -1.31  | 15.17 | 0.04    | 7.68   | 15.87   |
|         | C     | 18    | 18 | 22.24  | 13.93              | 15.31  | 29.17 | 7.16    | 18.38  | 59.88   |
|         | CY    | 11    | 9  | 21.56  | 26.26              | 1.38   | 41.75 | 2.14    | 6.26   | 66.46   |
| D+180   | BEAM  | 7     | 7  | 22.54  | 26.04              | -1.54  | 46.62 | 0.15    | 18.26  | 76.17   |
|         | C     | 18    | 0  | .      | .                  | .      | .     | .       | .      | .       |
|         | CY    | 11    | 11 | 43.45  | 43.15              | 14.47  | 72.44 | 9.65    | 25.21  | 125.16  |
| D+360   | BEAM  | 7     | 7  | 37.08  | 46.68              | -6.09  | 80.25 | 0.84    | 17.55  | 120.71  |
|         | C     | 18    | 0  | .      | .                  | .      | .     | .       | .      | .       |
|         | CY    | 11    | 11 | 23.96  | 31.96              | 2.49   | 45.43 | 0       | 13.19  | 96.16   |
| D+540   | BEAM  | 7     | 4  | 36.84  | 35.48              | -19.62 | 93.30 | 4.84    | 29.56  | 83.39   |
|         | C     | 18    | 0  | .      | .                  | .      | .     | .       | .      | .       |
|         | CY    | 11    | 9  | 34.29  | 42.31              | 1.77   | 66.82 | 0       | 12.85  | 117.78  |
| D+720   | BEAM  | 7     | 6  | 43.55  | 41.60              | -0.10  | 87.21 | 0       | 35.83  | 120.12  |
|         | C     | 18    | 0  | .      | .                  | .      | .     | .       | .      | .       |
|         | CY    | 11    | 8  | 22.23  | 16.19              | 8.70   | 35.77 | 6.58    | 15.03  | 51.11   |

Pre: pre-transplant; BEAM: BCNU. Etoposide. Aracytin and Melphalan; CY: Cyclophosphamide; C; Controls (healthy individuals); IL: inferior limit; SL: superior limit; Obs: observations.
